# Supplementary material
Source: PubMed Central journal article supplement (PMC3801044)
Supplement: 1311680110_pnas.201311680SI.pdf [file 1311680110_pnas.201311680SI.pdf]

# Supporting Information

Humphreys et al. 10.1073/pnas.1311680110

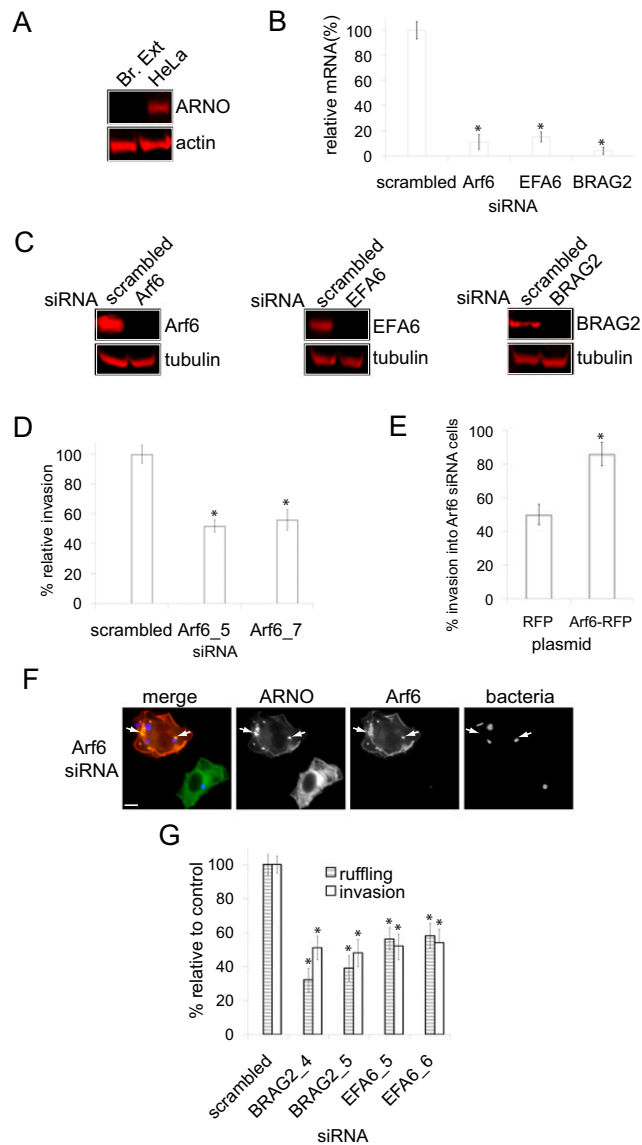

**Fig. S1.** Supplementary experiments. (A) Brain and HeLa cell extracts immunoblotted with antibodies to ARNO and actin as a loading control. (B) mRNA levels of ADP ribosylation factor 6 (Arf6), EFA6, or BRAG2 72 h after siRNA transfection. Values are relative to individual controls in each case. (C) Immunoblot of Arf6, BRAG2, or EFA6 after siRNA transfection with tubulin shown as control. (D) Influence of Arf6 depletion on *Salmonella* invasion. HeLa cells were transfected with scrambled or Arf6 siRNAs that each target distinct Arf6 mRNA sequences (Arf6 siRNA 5 or 7) 72 h before infection with *Salmonella* (10 min) encoding pM975 that expresses GFP inside pathogen-containing vacuoles. Error bars represent  $\pm$  SEM. Asterisks indicate a significant difference vs. mock ( $P < 0.05$ , ANOVA;  $n = 3$ ). (E) Restoration of invasion in Arf6-depleted cells expressing Arf6-RFP. HeLa cells were transfected with Arf6 siRNAs and control RFP or Arf6-RFP before *Salmonella* infection as in D, and quantification of invasion in RFP-expressing cells was performed. Error bars represent  $\pm$  SEM. Asterisks indicate a significant difference vs. mock ( $P < 0.05$ ,  $t$  test;  $n = 3$ ). (F) Restoration of ARNO-macropinosomes in Arf6-depleted cells expressing Arf6-RFP. HeLa cells were transfected with Arf6 siRNA 72 h before coexpression of Arf6-RFP and CFP-tagged ARNO and with fluorescently labeled WT *Salmonella* (bacteria). Arrows indicate macropinosomes in cells expressing Arf6 and ARNO. (Scale bar: 8  $\mu$ m.) (G) Influence of BRAG2 and EFA6 depletion on *Salmonella* invasion. HeLa cells were transfected with scrambled or BRAG2 and EFA6 siRNAs that each target distinct mRNA sequences (BRAG2 siRNAs 4 or 5, EFA6 siRNAs 5 or 6) 72 h before infection, and quantification of invasion was done as in D. Error bars represent  $\pm$  SEM. Asterisks indicate a significant difference vs. mock ( $P < 0.05$ , ANOVA;  $n = 3$ ).
